# Supplementary material for: Split versions of Cleave and Rescue selfish genetic elements for measured self limiting gene drive
Source: PLoS Genet. 2021 Feb 18;17(2):e1009385. doi: 10.1371/journal.pgen.1009385 (PMC7951863; doi:10.1371/journal.pgen.1009385)
Supplement: S1 Data — (XLSX) [file pgen.1009385.s014.xlsx]

## Sheet: Drive counts
2-locus drive counts
4 replicates
counts in generation 0 are not actual counts, but set to reflect the seed frequency
C;R….Cleaver;Rescue
Cleaver...Cleaver-only
Rescue...Rescue-only
Cargo-bearing= C;R+R
Cas9-bearing= C;R+C
Replicate 1
genotype	generation	counts	frequency	total	Cargo-bearing	freq_cargo	freq_Cas9
C;R	0	2	66.6667	3	2	66.6667	66.6667
wildtype	0	1	33.3333
Cleaver	0	0	0
Rescue	0	0	0
C;R	1	203	71.2281	285	203	71.2281	71.2281
wildtype	1	82	28.7719
Cleaver	1	0	0
Rescue	1	0	0
C;R	2	128	64.6465	198	166	83.8384	68.6869
wildtype	2	24	12.1212
Cleaver	2	8	4.0404
Rescue	2	38	19.1919
C;R	3	170	53.2915	319	282	88.4013	58.9342
wildtype	3	19	5.95611
Cleaver	3	18	5.64263
Rescue	3	112	35.1097
C;R	4	107	47.9821	223	204	91.4798	49.7758
wildtype	4	15	6.72646
Cleaver	4	4	1.79372
Rescue	4	97	43.4978
C;R	5	93	43.0556	216	200	92.5926	43.9815
wildtype	5	14	6.48148
Cleaver	5	2	0.925926
Rescue	5	107	49.537
C;R	6	93	41.3333	225	212	94.2222	41.3333
wildtype	6	13	5.77778
Cleaver	6	0	0
Rescue	6	119	52.8889
C;R	7	84	33.7349	249	236	94.7791	34.5382
wildtype	7	11	4.41767
Cleaver	7	2	0.803213
Rescue	7	152	61.0442
C;R	8	80	34.3348	233	229	98.2833	34.3348
wildtype	8	4	1.71674
Cleaver	8	0	0
Rescue	8	149	63.9485
C;R	9	58	25.2174	230	227	98.6957	25.6522
wildtype	9	2	0.869565
Cleaver	9	1	0.434783
Rescue	9	169	73.4783
C;R	10	68	29.5652	230	227	98.6957	30
wildtype	10	2	0.869565
Cleaver	10	1	0.434783
Rescue	10	159	69.1304
C;R	11	81	31.3953	258	254	98.4496	32.1705
wildtype	11	2	0.775194
Cleaver	11	2	0.775194
Rescue	11	173	67.0543
C;R	12	109	31.8713	342	340	99.4152	31.8713
wildtype	12	2	0.584795
Cleaver	12	0	0
Rescue	12	231	67.5439
C;R	13	92	19.7425	466	466	100	19.7425
wildtype	13	0	0
Cleaver	13	0	0
Rescue	13	374	80.2575
C;R	14	94	27.0893	347	347	100	27.0893
wildtype	14	0	0
Cleaver	14	0	0
Rescue	14	253	72.9107
C;R	15	83	23.2493	357	356	99.7199	23.5294
wildtype	15	0	0
Cleaver	15	1	0.280112
Rescue	15	273	76.4706
C;R	16	122	28.4382	429	428	99.7669	28.4382
wildtype	16	1	0.2331
Cleaver	16	0	0
Rescue	16	306	71.3287
C;R	17	100	23.4192	427	427	100	23.4192
wildtype	17	0	0
Cleaver	17	0	0
Rescue	17	327	76.5808
C;R	18	107	23.4649	456	456	100	23.4649
wildtype	18	0	0
Cleaver	18	0	0
Rescue	18	349	76.5351
C;R	19	80	27.027	296	296	100	27.027
wildtype	19	0	0
Cleaver	19	0	0
Rescue	19	216	72.973
C;R	20	74	26.0563	284	284	100	26.0563
wildtype	20	0	0
Cleaver	20	0	0
Rescue	20	210	73.9437
C;R	21	114	25.3333	450	450	100	25.3333
wildtype	21	0	0
Cleaver	21	0	0
Rescue	21	336	74.6667
C;R	22	55	28.2051	195	195	100	28.2051
wildtype	22	0	0
Cleaver	22	0	0
Rescue	22	140	71.7949
C;R	23	95	36.8217	258	258	100	36.8217
wildtype	23	0	0
Cleaver	23	0	0
Rescue	23	163	63.1783
C;R	24	87	33.7209	258	258	100	33.7209
wildtype	24	0	0
Cleaver	24	0	0
Rescue	24	171	66.2791
C;R	25	49	31.2102	157	157	100	31.2102
wildtype	25	0	0
Cleaver	25	0	0
Rescue	25	108	68.7898
C;R	26	54	26.3415	205	205	100	26.3415
wildtype	26	0	0
Cleaver	26	0	0
Rescue	26	151	73.6585
C;R	27	31	19.375	160	160	100	19.375
wildtype	27	0	0
Cleaver	27	0	0
Rescue	27	129	80.625
C;R	28	25	16.129	155	155	100	16.129
wildtype	28	0	0
Cleaver	28	0	0
Rescue	28	130	83.871
Replicate 2
genotype	generation	counts	frequency	total	Cargo-bearing	freq_cargo	freq_Cas9
C;R	0	2	66.6667	3	2	66.6667	66.6667
wildtype	0	1	33.3333
Cleaver	0	0	0
Rescue	0	0	0
C;R	1	149	76.4103	195	149	76.4103	76.4103
wildtype	1	46	23.5897
Cleaver	1	0	0
Rescue	1	0	0
C;R	2	186	62.4161	298	249	83.557	66.1074
wildtype	2	38	12.7517
Cleaver	2	11	3.69128
Rescue	2	63	21.1409
C;R	3	124	42.7586	290	252	86.8966	47.5862
wildtype	3	24	8.27586
Cleaver	3	14	4.82759
Rescue	3	128	44.1379
C;R	4	107	37.4126	286	257	89.8601	40.5594
wildtype	4	20	6.99301
Cleaver	4	9	3.14685
Rescue	4	150	52.4476
C;R	5	96	38.0952	252	230	91.2698	40.873
wildtype	5	15	5.95238
Cleaver	5	7	2.77778
Rescue	5	134	53.1746
C;R	6	86	32.2097	267	235	88.015	35.9551
wildtype	6	22	8.2397
Cleaver	6	10	3.74532
Rescue	6	149	55.8052
C;R	7	90	40.1786	224	210	93.75	41.0714
wildtype	7	12	5.35714
Cleaver	7	2	0.892857
Rescue	7	120	53.5714
C;R	8	71	26.0073	273	262	95.9707	26.0073
wildtype	8	11	4.0293
Cleaver	8	0	0
Rescue	8	191	69.9634
C;R	9	52	21.6667	240	231	96.25	21.6667
wildtype	9	9	3.75
Cleaver	9	0	0
Rescue	9	179	74.5833
C;R	10	74	24.026	308	305	99.026	24.026
wildtype	10	3	0.974026
Cleaver	10	0	0
Rescue	10	231	75
C;R	11	62	21.9081	283	278	98.2332	22.2615
wildtype	11	4	1.41343
Cleaver	11	1	0.353357
Rescue	11	216	76.3251
C;R	12	40	11.396	351	346	98.5755	11.396
wildtype	12	5	1.4245
Cleaver	12	0	0
Rescue	12	306	87.1795
C;R	13	38	7.56972	502	490	97.6096	7.56972
wildtype	13	12	2.39044
Cleaver	13	0	0
Rescue	13	452	90.0398
C;R	14	16	5.14469	311	304	97.7492	5.14469
wildtype	14	7	2.2508
Cleaver	14	0	0
Rescue	14	288	92.6045
C;R	15	5	1.98413	252	246	97.619	1.98413
wildtype	15	6	2.38095
Cleaver	15	0	0
Rescue	15	241	95.6349
C;R	16	11	2.73632	402	392	97.5124	2.73632
wildtype	16	10	2.48756
Cleaver	16	0	0
Rescue	16	381	94.7761
C;R	17	15	3.94737	380	363	95.5263	3.94737
wildtype	17	17	4.47368
Cleaver	17	0	0
Rescue	17	348	91.5789
C;R	18	10	2.28833	437	413	94.508	2.28833
wildtype	18	24	5.49199
Cleaver	18	0	0
Rescue	18	403	92.2197
C;R	19	6	1.63934	366	356	97.2678	1.63934
wildtype	19	10	2.73224
Cleaver	19	0	0
Rescue	19	350	95.6284
C;R	20	2	1.2987	154	152	98.7013	1.2987
wildtype	20	2	1.2987
Cleaver	20	0	0
Rescue	20	150	97.4026
C;R	21	3	1.68539	178	174	97.7528	1.68539
wildtype	21	4	2.24719
Cleaver	21	0	0
Rescue	21	171	96.0674
C;R	22	7	3.5533	197	195	98.9848	3.5533
wildtype	22	2	1.01523
Cleaver	22	0	0
Rescue	22	188	95.4315
C;R	23	5	1.71821	291	280	96.2199	1.71821
wildtype	23	11	3.78007
Cleaver	23		0
Rescue	23	275	94.5017
C;R	24	5	2.22222	225	213	94.6667	2.22222
wildtype	24	12	5.33333
Cleaver	24		0
Rescue	24	208	92.4444
C;R	25	3	1.69492	177	175	98.8701	1.69492
wildtype	25	2	1.12994
Cleaver	25	0	0
Rescue	25	172	97.1751
C;R	26	1	0.490196	204	201	98.5294	0.490196
wildtype	26	3	1.47059
Cleaver	26	0	0
Rescue	26	200	98.0392
C;R	27	0	0	142	140	98.5915	0
wildtype	27	2	1.40845
Cleaver	27	0	0
Rescue	27	140	98.5915
C;R	28	0	0	181	180	99.4475	0
wildtype	28	1	0.552486
Cleaver	28	0	0
Rescue	28	180	99.4475
Replicate 3
genotype	generation	counts	frequency	total	Cargo-bearing	freq_cargo	freq_Cas9
C;R	0	2	66.6667	3	2	66.6667	66.6667
wildtype	0	1	33.3333
Cleaver	0	0	0
Rescue	0	0	0
C;R	1	157	69.163	227	157	69.163	69.163
wildtype	1	70	30.837
Cleaver	1	0	0
Rescue	1	0	0
C;R	2	125	50.2008	249	190	76.3052	58.6345
wildtype	2	38	15.261
Cleaver	2	21	8.43373
Rescue	2	65	26.1044
C;R	3	179	50.1401	357	298	83.4734	54.6218
wildtype	3	43	12.0448
Cleaver	3	16	4.48179
Rescue	3	119	33.3333
C;R	4	120	44.9438	267	230	86.1423	48.6891
wildtype	4	27	10.1124
Cleaver	4	10	3.74532
Rescue	4	110	41.1985
C;R	5	146	39.782	367	311	84.7411	44.6866
wildtype	5	38	10.3542
Cleaver	5	18	4.90463
Rescue	5	165	44.9591
C;R	6	95	35.0554	271	238	87.8229	38.3764
wildtype	6	24	8.85609
Cleaver	6	9	3.32103
Rescue	6	143	52.7675
C;R	7	86	26.1398	329	293	89.0578	27.6596
wildtype	7	31	9.42249
Cleaver	7	5	1.51976
Rescue	7	207	62.9179
C;R	8	100	32.6797	306	266	86.9281	35.2941
wildtype	8	32	10.4575
Cleaver	8	8	2.61438
Rescue	8	166	54.2484
C;R	9	70	29.2887	239	209	87.4477	31.7992
wildtype	9	24	10.0418
Cleaver	9	6	2.51046
Rescue	9	139	58.159
C;R	10	82	30.1471	272	256	94.1176	32.7206
wildtype	10	9	3.30882
Cleaver	10	7	2.57353
Rescue	10	174	63.9706
C;R	11	75	28.626	262	255	97.3282	29.0076
wildtype	11	6	2.29008
Cleaver	11	1	0.381679
Rescue	11	180	68.7023
C;R	12	67	22.4832	298	291	97.651	23.8255
wildtype	12	3	1.00671
Cleaver	12	4	1.34228
Rescue	12	224	75.1678
C;R	13	100	23.0415	434	428	98.6175	23.5023
wildtype	13	4	0.921659
Cleaver	13	2	0.460829
Rescue	13	328	75.576
C;R	14	80	21.164	378	366	96.8254	21.4286
wildtype	14	11	2.91005
Cleaver	14	1	0.26455
Rescue	14	286	75.6614
C;R	15	88	21.8905	402	390	97.0149	23.6318
wildtype	15	5	1.24378
Cleaver	15	7	1.74129
Rescue	15	302	75.1244
C;R	16	96	20.4255	470	467	99.3617	20.4255
wildtype	16	3	0.638298
Cleaver	16	0	0
Rescue	16	371	78.9362
C;R	17	88	21.2048	415	415	100	21.2048
wildtype	17	0	0
Cleaver	17	0	0
Rescue	17	327	78.7952
C;R	18	98	23.0588	425	425	100	23.0588
wildtype	18	0	0
Cleaver	18	0	0
Rescue	18	327	76.9412
C;R	19	92	21.0046	438	438	100	21.0046
wildtype	19	0	0
Cleaver	19	0	0
Rescue	19	346	78.9954
C;R	20	37	21.7647	170	170	100	21.7647
wildtype	20	0	0
Cleaver	20	0	0
Rescue	20	133	78.2353
C;R	21	51	21.519	237	237	100	21.519
wildtype	21	0	0
Cleaver	21	0	0
Rescue	21	186	78.481
C;R	22	47	21.9626	214	214	100	21.9626
wildtype	22	0	0
Cleaver	22	0	0
Rescue	22	167	78.0374
C;R	23	70	22.0126	318	317	99.6855	22.0126
wildtype	23	1	0.314465
Cleaver	23	0	0
Rescue	23	247	77.673
C;R	24	41	19.6172	209	208	99.5215	19.6172
wildtype	24	1	0.478469
Cleaver	24		0
Rescue	24	167	79.9043
C;R	25	48	24.7423	194	194	100	24.7423
wildtype	25	0	0
Cleaver	25	0	0
Rescue	25	146	75.2577
C;R	26	52	21.6667	240	240	100	21.6667
wildtype	26	0	0
Cleaver	26	0	0
Rescue	26	188	78.3333
C;R	27	55	26.0664	211	211	100	26.0664
wildtype	27	0	0
Cleaver	27	0	0
Rescue	27	156	73.9336
C;R	28	33	21.5686	153	153	100	21.5686
wildtype	28	0	0
Cleaver	28	0	0
Rescue	28	120	78.4314
Replicate 4
genotype	generation	counts	frequency	total	Cargo-bearing	freq_cargo	freq_Cas9
C;R	0	2	66.6667	3	2	66.6667	66.6667
wildtype	0	1	33.3333
Cleaver	0	0	0
Rescue	0	0	0
C;R	1	151	74.0196	204	151	74.0196	74.0196
wildtype	1	53	25.9804
Cleaver	1	0	0
Rescue	1	0	0
C;R	2	223	62.2905	358	312	87.1508	65.9218
wildtype	2	33	9.21788
Cleaver	2	13	3.63128
Rescue	2	89	24.8603
C;R	3	164	49.697	330	301	91.2121	53.9394
wildtype	3	15	4.54545
Cleaver	3	14	4.24242
Rescue	3	137	41.5152
C;R	4	98	47.343	207	197	95.1691	48.3092
wildtype	4	8	3.86473
Cleaver	4	2	0.966184
Rescue	4	99	47.8261
C;R	5	138	51.1111	270	260	96.2963	52.2222
wildtype	5	7	2.59259
Cleaver	5	3	1.11111
Rescue	5	122	45.1852
C;R	6	81	37.5	216	210	97.2222	38.4259
wildtype	6	4	1.85185
Cleaver	6	2	0.925926
Rescue	6	129	59.7222
C;R	7	115	35.8255	321	316	98.4424	35.8255
wildtype	7	5	1.55763
Cleaver	7	0	0
Rescue	7	201	62.6168
C;R	8	104	31.4199	331	325	98.1873	31.4199
wildtype	8	6	1.81269
Cleaver	8	0	0
Rescue	8	221	66.7674
C;R	9	80	32.5203	246	243	98.7805	32.5203
wildtype	9	3	1.21951
Cleaver	9	0	0
Rescue	9	163	66.2602
C;R	10	92	31.8339	289	287	99.308	32.1799
wildtype	10	1	0.346021
Cleaver	10	1	0.346021
Rescue	10	195	67.474
C;R	11	111	33.1343	335	335	100	33.1343
wildtype	11	0	0
Cleaver	11	0	0
Rescue	11	224	66.8657
C;R	12	113	33.432	338	337	99.7041	33.432
wildtype	12	1	0.295858
Cleaver	12	0	0
Rescue	12	224	66.2722
C;R	13	164	29.1815	562	560	99.6441	29.1815
wildtype	13	2	0.355872
Cleaver	13	0	0
Rescue	13	396	70.4626
C;R	14	130	32.0197	406	406	100	32.0197
wildtype	14	0	0
Cleaver	14	0	0
Rescue	14	276	67.9803
C;R	15	135	28.8462	468	468	100	28.8462
wildtype	15	0	0
Cleaver	15	0	0
Rescue	15	333	71.1538
C;R	16	134	28.1513	476	476	100	28.1513
wildtype	16	0	0
Cleaver	16	0	0
Rescue	16	342	71.8487
C;R	17	138	22.4026	616	616	100	22.4026
wildtype	17	0	0
Cleaver	17	0	0
Rescue	17	478	77.5974
C;R	18	85	18.4783	460	460	100	18.4783
wildtype	18	0	0
Cleaver	18	0	0
Rescue	18	375	81.5217
C;R	19	104	22.3176	466	466	100	22.3176
wildtype	19	0	0
Cleaver	19	0	0
Rescue	19	362	77.6824
C;R	20	60	21.2766	282	281	99.6454	21.2766
wildtype	20	1	0.35461
Cleaver	20	0	0
Rescue	20	221	78.3688
C;R	21	57	22.9839	248	248	100	22.9839
wildtype	21	0	0
Cleaver	21	0	0
Rescue	21	191	77.0161
C;R	22	45	21.5311	209	208	99.5215	21.5311
wildtype	22	1	0.478469
Cleaver	22	0	0
Rescue	22	163	77.9904
C;R	23	49	17.8832	274	274	100	17.8832
wildtype	23		0
Cleaver	23		0
Rescue	23	225	82.1168
C;R	24	39	15.3543	254	254	100	15.3543
wildtype	24		0
Cleaver	24		0
Rescue	24	215	84.6457
C;R	25	39	15.3543	254	254	100	15.3543
wildtype	25		0
Cleaver	25		0
Rescue	25	215	84.6457
C;R	26	49	19.3676	253	253	100	19.3676
wildtype	26		0
Cleaver	26		0
Rescue	26	204	80.6324
C;R	27	49	25.5208	192	192	100	25.5208
wildtype	27	0	0
Cleaver	27	0	0
Rescue	27	143	74.4792
C;R	28	43	26.7081	161	161	100	26.7081
wildtype	28	0	0
Cleaver	28	0	0
Rescue	28	118	73.2919
Cargo(Rescue)-bearing
replicate	generation	frequency
A	0	33.3333
B	0	33.3333
C	0	33.3333
D	0	33.3333
A	1	71.2281
B	1	76.4103
C	1	69.163
D	1	74.0196
A	2	83.8384
B	2	83.557
C	2	76.3052
D	2	87.1508
A	3	88.4013
B	3	86.8966
C	3	83.4734
D	3	91.2121
A	4	91.4798
B	4	89.8601
C	4	86.1423
D	4	95.1691
A	5	92.5926
B	5	91.2698
C	5	84.7411
D	5	96.2963
A	6	94.2222
B	6	88.015
C	6	87.8229
D	6	97.2222
A	7	94.7791
B	7	93.75
C	7	89.0578
D	7	98.4424
A	8	98.2833
B	8	95.9707
C	8	86.9281
D	8	98.1873
A	9	98.6957
B	9	96.25
C	9	87.4477
D	9	98.7805
A	10	98.6957
B	10	99.026
C	10	94.1176
D	10	99.308
A	11	98.4496
B	11	98.2332
C	11	97.3282
D	11	100
A	12	99.4152
B	12	98.5755
C	12	97.651
D	12	99.7041
A	13	100
B	13	97.6096
C	13	98.6175
D	13	99.6441
A	14	100
B	14	97.7492
C	14	96.8254
D	14	100
A	15	99.7199
B	15	97.619
C	15	97.0149
D	15	100
A	16	99.7669
B	16	97.5124
C	16	99.3617
D	16	100
A	17	100
B	17	95.5263
C	17	100
D	17	100
A	18	100
B	18	97.1084
C	18	100
D	18	100
A	19	100
B	19	97.2678
C	19	100
D	19	100
A	20	100
B	20	98.7013
C	20	100
D	20	99.6454
A	21	100
B	21	97.7528
C	21	100
D	21	100
A	22	100
B	22	98.9848
C	22	100
D	22	99.5215
A	23	100
B	23	96.2199
C	23	99.6855
D	23	100
A	24	100
B	24	94.6667
C	24	99.5215
D	24	100
A	25	100
B	25	98.8701
C	25	100
D	25	100
A	26	100
B	26	98.5294
C	26	100
D	26	100
A	27	100
B	27	98.5915
C	27	100
D	27	100
A	28	100
B	28	99.4475
C	28	100
D	28	100
M	0	33.3333
M	1	65.5172
M	2	69.8303
M	3	79.072
M	4	86.397
M	5	91.9401
M	6	95.5477
M	7	97.6761
M	8	98.82
M	9	99.4039
M	10	99.695
M	11	99.8402
M	12	99.9138
M	13	99.9519
M	14	99.9723
M	15	99.9835
M	16	99.9899
M	17	99.9936
M	18	99.9959
M	19	99.9973
M	20	99.9982
M	21	99.9987
M	22	99.9991
M	23	99.9994
M	24	99.9995
M	25	99.9997
Cas9-bearing
replicate	generation	frequency
A	0	66.6667
B	0	66.6667
C	0	66.6667
D	0	66.6667
A	1	71.2281
B	1	76.4103
C	1	69.163
D	1	74.0196
A	2	68.6869
B	2	66.1074
C	2	58.6345
D	2	65.9218
A	3	58.9342
B	3	47.5862
C	3	54.6218
D	3	53.9394
A	4	49.7758
B	4	40.5594
C	4	48.6891
D	4	48.3092
A	5	43.9815
B	5	40.873
C	5	44.6866
D	5	52.2222
A	6	41.3333
B	6	35.9551
C	6	38.3764
D	6	38.4259
A	7	34.5382
B	7	41.0714
C	7	27.6596
D	7	35.8255
A	8	34.3348
B	8	26.0073
C	8	35.2941
D	8	31.4199
A	9	25.6522
B	9	21.6667
C	9	31.7992
D	9	32.5203
A	10	30
B	10	24.026
C	10	32.7206
D	10	32.1799
A	11	32.1705
B	11	22.2615
C	11	29.0076
D	11	33.1343
A	12	31.8713
B	12	11.396
C	12	23.8255
D	12	33.432
A	13	19.7425
B	13	7.56972
C	13	23.5023
D	13	29.1815
A	14	27.0893
B	14	5.14469
C	14	21.4286
D	14	32.0197
A	15	23.5294
B	15	1.98413
C	15	23.6318
D	15	28.8462
A	16	28.4382
B	16	2.73632
C	16	20.4255
D	16	28.1513
A	17	23.4192
B	17	3.94737
C	17	21.2048
D	17	22.4026
A	18	23.4649
B	18	2.28833
C	18	23.0588
D	18	18.4783
A	19	27.027
B	19	1.63934
C	19	21.0046
D	19	22.3176
A	20	26.0563
B	20	1.2987
C	20	21.7647
D	20	21.2766
A	21	25.3333
B	21	1.68539
C	21	21.519
D	21	22.9839
A	22	28.2051
B	22	3.5533
C	22	21.9626
D	22	21.5311
A	23	36.8217
B	23	1.71821
C	23	22.0126
D	23	17.8832
A	24	33.7209
B	24	2.22222
C	24	19.6172
D	24	15.3543
A	25	31.2102
B	25	1.69492
C	25	24.7423
D	25	15.3543
A	26	26.3415
B	26	0.490196
C	26	21.6667
D	26	19.3676
A	27	19.375
B	27	0
C	27	26.0664
D	27	25.5208
A	28	16.129
B	28	0
C	28	21.5686
D	28	26.7081
M	0	33.3333
M	1	65.5172
M	2	51.4172
M	3	49.9273
M	4	48.6682
M	5	47.3594
M	6	46.1112
M	7	44.926
M	8	43.7893
M	9	42.6807
M	10	41.5879
M	11	40.5048
M	12	39.4292
M	13	38.3606
M	14	37.2991
M	15	36.2455
M	16	35.2007
M	17	34.1654
M	18	33.1408
M	19	32.1278
M	20	31.1272
M	21	30.1401
M	22	29.1674
M	23	28.2097
M	24	27.268
M	25	26.343

## Sheet: Dilution with w1118 drive count
counts in populations from drive experiment with 50% wildtypes added at generation 15
Replicate 1
genotype	generation	counts	frequency	total	Cargo-bearing	freq_cargo	freq_Cas9
C;R	1	17	10.303	165	84	50.9091	10.303
wildtype	1	81	49.0909
Cleaver	1	0	0
Rescue	1	67	40.6061
C;R	2	20	10.7527	186	133	71.5054	11.828
wildtype	2	51	27.4194
Cleaver	2	2	1.07527
Rescue	2	113	60.7527
C;R	3	23	9.91379	232	164	70.6897	11.6379
wildtype	3	64	27.5862
Cleaver	3	4	1.72414
Rescue	3	141	60.7759
C;R	4	10	5.2356	191	136	71.2042	6.28272
wildtype	4	53	27.7487
Cleaver	4	2	1.04712
Rescue	4	126	65.9686
C;R	5	12	5.38117	223	159	71.3004	6.72646
wildtype	5	61	27.3543
Cleaver	5	3	1.34529
Rescue	5	147	65.9193
C;R	6	2	1.25786	159	111	69.8113	4.40252
wildtype	6	43	27.044
Cleaver	6	5	3.14465
Rescue	6	109	68.5535
C;R	7	4	2.15054	186	134	72.043	2.68817
wildtype	7	51	27.4194
Cleaver	7	1	0.537634
Rescue	7	130	69.8925
C;R	8	3	1.64835	182	136	74.7253	1.64835
wildtype	8	46	25.2747
Cleaver	8	0	0
Rescue	8	133	73.0769
C;R	9	2	0.588235	340	261	76.7647	0.882353
wildtype	9	78	22.9412
Cleaver	9	1	0.294118
Rescue	9	259	76.1765
C;R	10	2	1.01523	197	149	75.6345	1.01523
wildtype	10	48	24.3655
Cleaver	10	0	0
Rescue	10	147	74.6193
C;R	11	1	0.411523	243	195	80.2469	0.823045
wildtype	11	47	19.3416
Cleaver	11	1	0.411523
Rescue	11	194	79.8354
C;R	12	0	0	212	174	82.0755	0
wildtype	12	38	17.9245
Cleaver	12	0	0
Rescue	12	174	82.0755
C;R	13	0	0	166	136	81.9277	0
wildtype	13	30	18.0723
Cleaver	13	0	0
Rescue	13	136	81.9277
C;R	14	0	0	135	108	80	0
wildtype	14	27	20
Cleaver	14	0	0
Rescue	14	108	80
Replicate 2
genotype	generation	counts	frequency	total	Cargo-bearing	freq_cargo	freq_Cas9
C;R	1	1	0.625	160	73	45.625	0.625
wildtype	1	87	54.375
Cleaver	1	0	0
Rescue	1	72	45
C;R	2	1	0.574713	174	117	67.2414	0.574713
wildtype	2	57	32.7586
Cleaver	2	0	0
Rescue	2	116	66.6667
C;R	3	0	0	175	130	74.2857	0
wildtype	3	45	25.7143
Cleaver	3	0	0
Rescue	3	130	74.2857
C;R	4	0	0	163	105	64.4172	0
wildtype	4	58	35.5828
Cleaver	4	0	0
Rescue	4	105	64.4172
C;R	5	0	0	187	144	77.0053	0
wildtype	5	43	22.9947
Cleaver	5	0	0
Rescue	5	144	77.0053
C;R	6	0	0	150	115	76.6667	0
wildtype	6	35	23.3333
Cleaver	6	0	0
Rescue	6	115	76.6667
C;R	7	0	0	154	121	78.5714	0
wildtype	7	33	21.4286
Cleaver	7	0	0
Rescue	7	121	78.5714
C;R	8	0	0	206	161	78.1553	0
wildtype	8	45	21.8447
Cleaver	8	0	0
Rescue	8	161	78.1553
C;R	9	0	0	315	270	85.7143	0
wildtype	9	45	14.2857
Cleaver	9	0	0
Rescue	9	270	85.7143
C;R	10	0	0	187	151	80.7487	0
wildtype	10	36	19.2513
Cleaver	10	0	0
Rescue	10	151	80.7487
C;R	11	0	0	186	152	81.7204	0
wildtype	11	34	18.2796
Cleaver	11	0	0
Rescue	11	152	81.7204
C;R	12	0	0	189	147	77.7778	0
wildtype	12	42	22.2222
Cleaver	12	0	0
Rescue	12	147	77.7778
C;R	13	0	0	137	109	79.562	0
wildtype	13	28	20.438
Cleaver	13	0	0
Rescue	13	109	79.562
C;R	14	0	0	196	146	74.4898	0
wildtype	14	50	25.5102
Cleaver	14	0	0
Rescue	14	146	74.4898
Replicate 3
genotype	generation	counts	frequency	total	Cargo-bearing	freq_cargo	freq_Cas9
C;R	1	15	8.33333	180	90	50	8.33333
wildtype	1	90	50
Cleaver	1	0	0
Rescue	1	75	41.6667
C;R	2	31	13.5965	228	160	70.1754	13.5965
wildtype	2	68	29.8246
Cleaver	2	0	0
Rescue	2	129	56.5789
C;R	3	19	8.37004	227	169	74.4493	9.2511
wildtype	3	56	24.6696
Cleaver	3	2	0.881057
Rescue	3	150	66.0793
C;R	4	14	6.93069	202	160	79.2079	7.92079
wildtype	4	40	19.802
Cleaver	4	2	0.990099
Rescue	4	146	72.2772
C;R	5	5	2.53807	197	139	70.5584	3.04569
wildtype	5	57	28.934
Cleaver	5	1	0.507614
Rescue	5	134	68.0203
C;R	6	6	3.48837	172	126	73.2558	3.48837
wildtype	6	46	26.7442
Cleaver	6	0	0
Rescue	6	120	69.7674
C;R	7	9	4.73684	190	149	78.4211	4.73684
wildtype	7	41	21.5789
Cleaver	7	0	0
Rescue	7	140	73.6842
C;R	8	11	5.2381	210	166	79.0476	6.66667
wildtype	8	41	19.5238
Cleaver	8	3	1.42857
Rescue	8	155	73.8095
C;R	9	15	5.01672	299	249	83.2776	5.01672
wildtype	9	50	16.7224
Cleaver	9	0	0
Rescue	9	234	78.2609
C;R	10	4	2.01005	199	168	84.4221	2.01005
wildtype	10	31	15.5779
Cleaver	10	0	0
Rescue	10	164	82.4121
C;R	11	4	1.94175	206	167	81.068	2.42718
wildtype	11	38	18.4466
Cleaver	11	1	0.485437
Rescue	11	163	79.1262
C;R	12	6	3.15789	190	156	82.1053	3.15789
wildtype	12	34	17.8947
Cleaver	12	0	0
Rescue	12	150	78.9474
C;R	13	2	1.42857	140	110	78.5714	1.42857
wildtype	13	30	21.4286
Cleaver	13	0	0
Rescue	13	108	77.1429
C;R	14	3	1.875	160	121	75.625	1.875
wildtype	14	39	24.375
Cleaver	14	0	0
Rescue	14	118	73.75
Replicate 4
genotype	generation	counts	frequency	total	Cargo-bearing	freq_cargo	freq_Cas9
C;R	1	16	8.37696	191	92	48.1675	8.37696
wildtype	1	99	51.8325
Cleaver	1	0	0
Rescue	1	76	39.7906
C;R	2	17	9.09091	187	107	57.2193	9.09091
wildtype	2	80	42.7807
Cleaver	2	0	0
Rescue	2	90	48.1283
C;R	3	13	7.06522	184	104	56.5217	7.6087
wildtype	3	79	42.9348
Cleaver	3	1	0.543478
Rescue	3	91	49.4565
C;R	4	11	5.11628	215	140	65.1163	5.11628
wildtype	4	75	34.8837
Cleaver	4	0	0
Rescue	4	129	60
C;R	5	10	5.81395	172	107	62.2093	5.81395
wildtype	5	65	37.7907
Cleaver	5	0	0
Rescue	5	97	56.3953
C;R	6	5	2.90698	172	107	62.2093	3.48837
wildtype	6	64	37.2093
Cleaver	6	1	0.581395
Rescue	6	102	59.3023
C;R	7	8	4.65116	172	110	63.9535	4.65116
wildtype	7	62	36.0465
Cleaver	7	0	0
Rescue	7	102	59.3023
C;R	8	10	4.13223	242	147	60.7438	5.3719
wildtype	8	92	38.0165
Cleaver	8	3	1.23967
Rescue	8	137	56.6116
C;R	9	9	3.64372	247	150	60.7287	5.26316
wildtype	9	93	37.6518
Cleaver	9	4	1.61943
Rescue	9	141	57.085
C;R	10	8	3.6036	222	127	57.2072	5.40541
wildtype	10	91	40.991
Cleaver	10	4	1.8018
Rescue	10	119	53.6036
C;R	11	6	2.89855	207	115	55.5556	4.34783
wildtype	11	89	42.9952
Cleaver	11	3	1.44928
Rescue	11	109	52.657
C;R	12	3	1.52284	197	121	61.4213	3.5533
wildtype	12	72	36.5482
Cleaver	12	4	2.03046
Rescue	12	118	59.8985
C;R	13	3	1.91083	157	90	57.3248	3.18471
wildtype	13	65	41.4013
Cleaver	13	2	1.27389
Rescue	13	87	55.414
C;R	14	4	2.23464	179	99	55.3073	3.35196
wildtype	14	78	43.5754
Cleaver	14	2	1.11732
Rescue	14	95	53.0726
Cargo(rescue)-bearing
replicate	generation	frequency
A	0	99.7199		note: frequencies of seed generation 0 were set as freq_cargo@generation 15 from initial drive experiment
B	0	97.619
C	0	97.0149
D	0	100
A	1	50.9091
B	1	45.625
C	1	50
D	1	48.1675
A	2	71.5054
B	2	67.2414
C	2	70.1754
D	2	57.2193
A	3	70.6897
B	3	74.2857
C	3	74.4493
D	3	56.5217
A	4	71.2042
B	4	64.4172
C	4	79.2079
D	4	65.1163
A	5	71.3004
B	5	77.0053
C	5	70.5584
D	5	62.2093
A	6	69.8113
B	6	76.6667
C	6	73.2558
D	6	62.2093
A	7	72.043
B	7	78.5714
C	7	78.4211
D	7	63.9535
A	8	74.7253
B	8	78.1553
C	8	79.0476
D	8	60.7438
A	9	76.7647
B	9	85.7143
C	9	83.2776
D	9	60.7287
A	10	75.6345
B	10	80.7487
C	10	84.4221
D	10	57.2072
A	11	80.2469
B	11	81.7204
C	11	81.068
D	11	55.5556
A	12	82.0755
B	12	77.7778
C	12	82.1053
D	12	61.4213
A	13	81.9277
B	13	79.562
C	13	78.5714
D	13	57.3248
A	14	80
B	14	74.4898
C	14	75.625
D	14	55.3073
Cas9-bearing
replicate	generation	frequency
A	0	23.5294		note: frequencies of seed generation 0 were set as freq_Cas9@generation 15 from initial drive experiment
B	0	1.98413
C	0	23.6318
D	0	28.8462
A	1	10.303
B	1	0.625
C	1	8.33333
D	1	8.37696
A	2	11.828
B	2	0.574713
C	2	13.5965
D	2	9.09091
A	3	11.6379
B	3	0
C	3	9.2511
D	3	7.6087
A	4	6.28272
B	4	0
C	4	7.92079
D	4	5.11628
A	5	6.72646
B	5	0
C	5	3.04569
D	5	5.81395
A	6	4.40252
B	6	0
C	6	3.48837
D	6	3.48837
A	7	2.68817
B	7	0
C	7	4.73684
D	7	4.65116
A	8	1.64835
B	8	0
C	8	6.66667
D	8	5.3719
A	9	0.882353
B	9	0
C	9	5.01672
D	9	5.26316
A	10	1.01523
B	10	0
C	10	2.01005
D	10	5.40541
A	11	0.823045
B	11	0
C	11	2.42718
D	11	4.34783
A	12	0
B	12	0
C	12	3.15789
D	12	3.5533
A	13	0
B	13	0
C	13	1.42857
D	13	3.18471
A	14	0
B	14	0
C	14	1.875
D	14	3.35196

## Sheet: Control drive counts
controls
Cas9 only, Cleaver on chromosome 2
Replicate	Generation	Cas9	w-	frequency
A	0	120	109	52.4017
B	0	119	103	53.6036
C	0	125	121	50.813
A	1	88	94	48.3516
B	1	120	101	54.2986
C	1	98	95	50.7772
A	2	81	150	35.0649
B	2	117	178	39.661
C	2	98	107	47.8049
A	3	76	122	38.3838
B	3	128	153	45.5516
C	3	74	135	35.4067
A	4	68	154	30.6306
B	4	81	134	37.6744
C	4	88	159	35.6275
A	5	76	180	29.6875
B	5	83	130	38.9671
C	5	79	150	34.4978
A	8	22	118	15.7143
B	8	64	102	38.5542
C	8	58	100	36.7089
A	9	78	225	25.7426
B	9	104	226	31.5152
C	9	114	232	32.948
A	10	87	176	33.0798
B	10	78	247	24
C	10	98	208	32.0261
A	11	73	240	23.3227
B	11	63	225	21.875
C	11	114	213	34.8624
A	12	96	194	33.1034
B	12	126	396	24.1379
C	12	80	390	17.0213
A	13	47	97	32.6389
B	13	62	198	23.8462
C	13	40	195	17.0213
A	14	37	211	14.9194
B	14	97	212	31.3916
C	14	31	227	12.0155
A	15	50	202	19.8413
B	15	71	181	28.1746
C	15	44	186	19.1304
A	16	39	134	22.5434
B	16	66	143	31.5789
C	16	36	123	22.6415
A	17	39	136	22.2857
B	17	68	139	32.8502
C	17	49	176	21.7778
A	18	37	158	18.9744
B	18	57	147	27.9412
C	18	40	133	23.1214
controls
Cargo, Rescue(tko) + gRNAs(tko) on chromosome 3
Replicate	Generation	opie	w-	frequency
A	1	123	118	51.0373
B	1	115	122	48.5232
C	1	127	151	45.6835
D	1	139	137	50.3623
A	2	167	163	50.6061
B	2	131	205	38.9881
C	2	138	194	41.5663
D	2	158	192	45.1429
A	3	164	184	47.1264
B	3	122	235	34.1737
C	3	179	222	44.6384
D	3	196	251	43.8479
A	4	72	78	48
B	4	49	89	35.5072
C	4	72	96	42.8571
D	4	60	95	38.7097
A	5	99	98	50.2538
B	5	65	104	38.4615
C	5	74	100	42.5287
D	5	103	122	45.7778
A	6	100	120	45.4545
B	6	74	137	35.0711
C	6	75	107	41.2088
D	6	77	103	42.7778
A	7	124	134	48.062
B	7	99	207	32.3529
C	7	91	178	33.829
D	7	72	189	27.5862
A	8	72	108	40
B	8	69	120	36.5079
C	8	81	130	38.3886
D	8	59	99	37.3418
A	9	73	80	47.7124
B	9	78	129	37.6812
C	9	64	107	37.4269
D	9	48	150	24.2424
A	10	91	107	45.9596
B	10	70	133	34.4828
C	10	66	152	30.2752
D	10	59	170	25.7642
A	11	86	98	46.7391
B	11	78	157	33.1915
C	11	73	137	34.7619
D	11	56	104	35
A	12	99	132	42.8571
B	12	73	163	30.9322
C	12	45	108	29.4118
D	12	52	103	33.5484
